# Supplementary material for: N‐terminally and C‐terminally truncated forms of glucose‐dependent insulinotropic polypeptide are high‐affinity competitive antagonists of the human GIP receptor
Source: PubMed Central journal article supplement — Br J Pharmacol. 2016 Jan 30;173(5):826–38. doi: 10.1111/bph.13384 (PMC4761099; doi:10.1111/bph.13384), 2016-01-30
Supplement: BPH-173-826-s001.pdf [file BPH-173-826-s001.pdf]

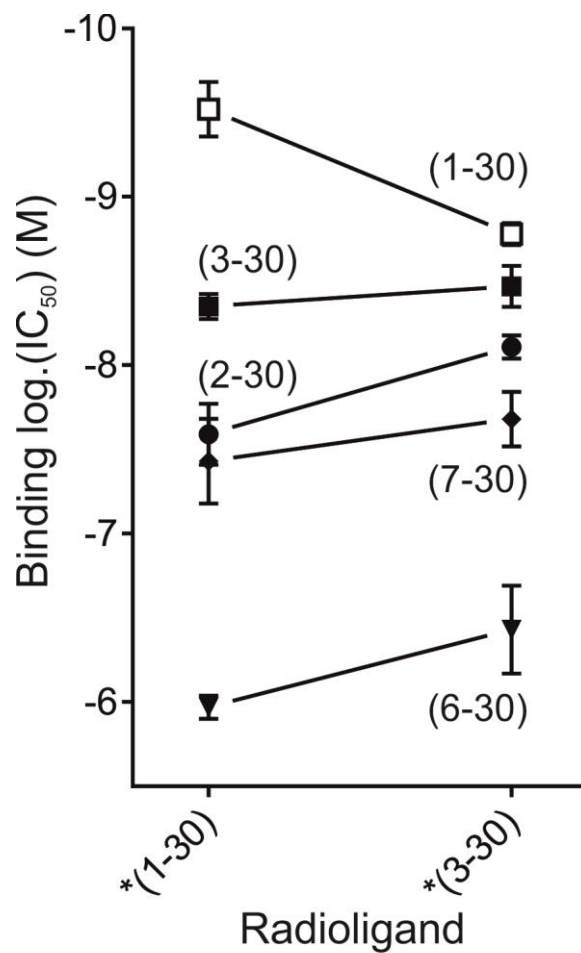

**Supplementary Figure 1. The functionality of the N- and C-terminal truncated ligands reflects the binding properties.** Heterologous competitive binding with <sup>125</sup>I-GIP(1-30)NH<sub>2</sub>, <sup>125</sup>I-GIP(2-30)NH<sub>2</sub>, and <sup>125</sup>I-GIP(3-30)NH<sub>2</sub> radioligands on the GIP receptor in transiently transfected COS-7 cells, mean ± SEM, n = 3-5. LogIC<sub>50</sub> from the heterologous binding studies were plotted against the radioligand and the values were connected for each cold ligand: GIP(1-30)NH<sub>2</sub> (□), GIP(2-30)NH<sub>2</sub> (●), GIP(3-30) (■)NH<sub>2</sub>, GIP(6-30)NH<sub>2</sub> (▼), and GIP(7-30)NH<sub>2</sub> (◆).
