# Supplementary material for: N‐terminally and C‐terminally truncated forms of glucose‐dependent insulinotropic polypeptide are high‐affinity competitive antagonists of the human GIP receptor
Source: PubMed Central journal article supplement — Br J Pharmacol. 2016 Jan 30;173(5):826–38. doi: 10.1111/bph.13384 (PMC4761099; doi:10.1111/bph.13384), 2016-01-30
Supplement: BPH-173-826-s002.pdf [file BPH-173-826-s002.pdf]

| Variant                   | <i>In vitro</i> |    |      | <i>In vivo</i>                                                                                                                                                                                                  |     |      | Ref                                                                                                                                                                                    |
|---------------------------|-----------------|----|------|-----------------------------------------------------------------------------------------------------------------------------------------------------------------------------------------------------------------|-----|------|----------------------------------------------------------------------------------------------------------------------------------------------------------------------------------------|
|                           | GIP             | RL | GIPR | Results                                                                                                                                                                                                         | GIP | GIPR |                                                                                                                                                                                        |
| GIP(1-3)                  | B               | P  | Ha   | Pancreas membranes: <i>No binding</i> (10 $\mu$ M)                                                                                                                                                              |     |      | (Maletti et al., 1986)                                                                                                                                                                 |
| GIP(1-6)NH <sub>2</sub>   | US              | P  | R    | CHO-cells: No cAMP production, <i>no binding</i> (10 $\mu$ M)                                                                                                                                                   |     |      | (Hinke et al., 2001)                                                                                                                                                                   |
| GIP(1-7)NH <sub>2</sub>   | US              | P  | R    | CHO-cells: No cAMP production, <i>no binding</i> (10 $\mu$ M)                                                                                                                                                   |     |      |                                                                                                                                                                                        |
| GIP(1-13)NH <sub>2</sub>  | P               | P  | R    | CHO-cells: 13% cAMP (20 $\mu$ M), 5% <i>binding</i> (10 $\mu$ M)                                                                                                                                                |     |      |                                                                                                                                                                                        |
| GIP(1-14)NH <sub>2</sub>  | P               | P  | R    | CHO-cells: 73% cAMP (20 $\mu$ M), 28% <i>binding</i> (10 $\mu$ M)                                                                                                                                               | P   | R    | 26% insulin release (5 nM), sig. glucose decrease                                                                                                                                      |
|                           |                 |    |      |                                                                                                                                                                                                                 | P   | R    | Pancreas perfusion: No insulin release (10 ng/ml)                                                                                                                                      |
| GIP(1-14)                 | H               | P  | R    | CHO-cells: Full agonist (cAMP), 51% <i>binding</i> (10 $\mu$ M)                                                                                                                                                 |     |      | (Hinke et al., 2001)                                                                                                                                                                   |
| GIP(1-15)NH <sub>2</sub>  | P               | P  | R    | CHO-cells: 4% cAMP (20 $\mu$ M), 4% <i>binding</i> (10 $\mu$ M)                                                                                                                                                 |     |      |                                                                                                                                                                                        |
| GIP(1-15)                 | P               | P  | R    | CHO-cells: No cAMP production, <i>no binding</i> (10 $\mu$ M)                                                                                                                                                   |     |      |                                                                                                                                                                                        |
| GIP(1-16)                 | B               | P  | H    | <i>No binding</i> (10 $\mu$ M)                                                                                                                                                                                  |     |      | (Maletti et al., 1986)                                                                                                                                                                 |
|                           | US              |    | US/R | CHL: 35% cAMP, BRIN-BD11: 10-50% insulin (1 $\mu$ M)                                                                                                                                                            |     |      | (Gault et al., 2002)                                                                                                                                                                   |
|                           | US              |    | R    | BRIN-BD11: Insulin 1.4 fold of basal (1 $\mu$ M)                                                                                                                                                                | US  | M    | Ob/ob: No effect on glucose/insulin (25 nmol/kg)                                                                                                                                       |
| GIP(1-30)NH <sub>2</sub>  | P               |    | R    | CHO-cells and L293-cells: Full agonist (cAMP), EC <sub>50</sub> equal to GIP(1-42). IC <sub>50</sub> 2.0 nM. RINm5F: cAMP full agonism, 10-fold decreased EC <sub>50</sub> . 10-fold decreased IC <sub>50</sub> | P   | R    | Equal glucose decrease (1pmol/min/100 g)<br>Pancreas perfusion: Full insulin response (5 nM)<br>Pancreas perfusion: Full insulin response, 65% reduced somatostatin response (1 ng/ml) |
|                           |                 |    |      |                                                                                                                                                                                                                 | US  | R    | Pancreas: Full insulin response (1 nmol/kg/h)<br>Stomach: 10-fold lower gastric acid-inhibition (10 nmol/kg/h)                                                                         |
| GIP(1-30)OH               | Hu              | P  | P    | CHO-cells: 11-fold decreased IC <sub>50</sub> than pGIP(1-42)                                                                                                                                                   | Hu  | R    | Pancreas perfusion: Full insulin response (1 nM)                                                                                                                                       |
| GIP(1-38)                 |                 |    |      |                                                                                                                                                                                                                 | P   | R    | Pancreas perfusion: Full insulin response (UC)                                                                                                                                         |
| GIP(1-39)                 |                 |    |      |                                                                                                                                                                                                                 | B   | R    | Pancreas perfusion: Full insulin response (1 nM)                                                                                                                                       |
| GIP(6-30)NH <sub>2</sub>  | P               | P  | R    | CHO-cells: cAMP: 58% inhibition (0.1 $\mu$ M), equal IC <sub>50</sub>                                                                                                                                           |     |      | (Gelling et al., 1997)                                                                                                                                                                 |
| GIP(7-30)NH <sub>2</sub>  | P               | P  | R    | CHO-cells: No cAMP production (20 $\mu$ M), IC <sub>50</sub> in nM-range, IC <sub>50</sub> 23.7 nM<br>L293-cells: cAMP inhibition IC <sub>50</sub> 0.1 $\mu$ M. IC <sub>50</sub> 200 nM                         | P   | R    | Anesthesia: 100 nmol/kg abolishes 1.5 nmol/kg GIP-insulin secretion and reduces meal-induced insulin with 55%.                                                                         |
|                           | P               | P  | R    | CHO-cells: 10 $\mu$ M decreases 1 nM GIP-cAMP by 34%<br>IC <sub>50</sub> 177 nM                                                                                                                                 | US  | R    | 3 $\mu$ g/250 g: 30% inhibition of glucose-induced insulin, 15% plasma glucose, 54% meal-induced insulin. 20 $\mu$ g/kg reduced glucose-uptake 30%.                                    |
| GIP(10-30)                | P               | P  | R    | CHO: 50%-inhi. cAMP (10 $\mu$ M).<br>187 fold decreased IC <sub>50</sub>                                                                                                                                        |     |      | (Gelling et al., 1997)                                                                                                                                                                 |
| GIP(15-30)NH <sub>2</sub> | P               | P  | R    | CHO: cAMP, antagonism (10 $\mu$ M): 30 % of GIP(7-30)<br>IC <sub>50</sub> 1400 nM                                                                                                                               | P   | R    | Pancreas perfusion: No insulin release (1 ng/ml)                                                                                                                                       |
| GIP(16-30)NH <sub>2</sub> | P               | P  | R    | CHO: cAMP, antagonism(10 $\mu$ M): 20 % of GIP(7-30)<br>IC <sub>50</sub> 2530 nM.<br>L293-cells: No cAMP or GIP-inhib.(10 nM)                                                                                   |     |      | (Hinke et al., 2001, Morrow et al., 1996)                                                                                                                                              |
| GIP(17-30)NH <sub>2</sub> | P               | P  | R    | CHO: cAMP, antagonism (10 $\mu$ M): 30 % of GIP(7-30)<br>IC <sub>50</sub> 1540 nM                                                                                                                               | P   | R    | Pancreas perfusion: 38% insulin release (1 ng/ml)                                                                                                                                      |
|                           | US              |    | US   | CHL-cells: 1 $\mu$ M inhibits cAMP (0.1 $\mu$ M GIP) 15%<br>BRIN-BD11: 1 $\mu$ M inhibits insulin (0.1 $\mu$ M GIP) 11%                                                                                         |     |      | (Gault et al., 2002)                                                                                                                                                                   |
|                           | P               | P  | P    | CHO: No cAMP production, <i>no binding</i> (1 $\mu$ M)                                                                                                                                                          |     |      | (Wheeler et al., 1995)                                                                                                                                                                 |
| GIP(18-28)                | Hu              | P  | P    | CHO: <i>No binding</i> (1 $\mu$ M)                                                                                                                                                                              |     |      |                                                                                                                                                                                        |
| GIP(19-30)NH <sub>2</sub> | P               | P  | R    | CHO-cells: 40% cAMP production (20 $\mu$ M), 52% <i>binding</i> (10 $\mu$ M)                                                                                                                                    | P   | R    | Pancreas perfusion: 60% insulin release (1 ng/ml)<br>Anesthesia: Sig. glucose decrease (100 pmol/min/100g)                                                                             |
|                           | P               | P  | R    | CHO-cells: No cAMP (1 $\mu$ M), <i>no binding</i> (1 $\mu$ M)                                                                                                                                                   |     |      | (Wheeler et al., 1995)                                                                                                                                                                 |
|                           | B               | P  | Ha   | Pancreas membranes: <i>No binding</i>                                                                                                                                                                           |     |      | (Maletti et al., 1986)                                                                                                                                                                 |
| GIP(21-30)NH <sub>2</sub> | P               |    | R    | L293-cells: No activity, no inhibition of pGIP(1-42)                                                                                                                                                            |     |      | (Tseng et al., 1996)                                                                                                                                                                   |
| GIP(21-26)                | Hu              | P  | P    | CHO-cells: <i>No binding</i> (1 $\mu$ M)                                                                                                                                                                        |     |      | (Wheeler et al., 1995)                                                                                                                                                                 |
| GIP(3-42)                 | US              |    | R    | BRIN-BD11: 30% cAMP (EC <sub>50</sub> $\approx$ nM) and 1 $\mu$ M inhibits 45%. 70% inhibition of insulin release by 1 $\mu$ M                                                                                  |     |      | (Kerr et al., 2011)                                                                                                                                                                    |
|                           | P               | US | R    | COS-cells: No cAMP<br>IC <sub>50</sub> $\approx$ nM, 10 fold reduced affinity                                                                                                                                   | P   | R    | Pan.perfusion: Inhibition of insulin, IC <sub>50</sub> 138 nM                                                                                                                          |
| GIP(4-42)                 | B               | P  | Ha   | Pancreas membranes: IC <sub>50</sub> 5 nM                                                                                                                                                                       |     |      | (Maletti et al., 1986)                                                                                                                                                                 |
|                           | US              |    | R    | BRIN-BD11: 50% cAMP, 30% inhibition of insulin (1 $\mu$ M)                                                                                                                                                      | M   |      | Ob/ob: Glucose increase (25 nmol/kg)                                                                                                                                                   |
|                           | US              |    | US   | CHL-cells: 1 $\mu$ M inhibits cAMP (0.1 $\mu$ M GIP) 40%<br>BRIN-BD11: 1 $\mu$ M inhibits insulin (0.1 $\mu$ M GIP) 23%                                                                                         |     |      | (Gault et al., 2002)                                                                                                                                                                   |
| GIP(5-42)                 | US              |    | R    | BRIN-BD11: 35% cAMP (1 $\mu$ M), insulin-inhibition 70%                                                                                                                                                         | M   |      | Ob/ob: Glucose increase (25 nmol/kg)                                                                                                                                                   |
| GIP(6-42)                 | US              |    | R    | BRIN-BD11: 80% cAMP (1 $\mu$ M), insulin-inhibition 40%                                                                                                                                                         |     |      | (Kerr et al., 2011)                                                                                                                                                                    |
| GIP(7-42)                 | US              |    | R    | BRIN-BD11: 65% cAMP (1 $\mu$ M), insulin-inhibition 55%                                                                                                                                                         | M   |      | Ob/ob: Glucose increase (25 nmol/kg)                                                                                                                                                   |
| GIP(8-42)                 | US              |    | R    | RINm5F: 30-fold decrease of GIP(1-42) potency (5 $\mu$ M)                                                                                                                                                       |     |      | (Cheng et al., 2015)                                                                                                                                                                   |
|                           | US              |    | R    | BRIN-BD11: 16% cAMP (1 $\mu$ M), insulin-inhibition 65%                                                                                                                                                         | M   |      | Ob/ob: 1.4 fold glucose increase, sig. insulin decrease (25 nmol/kg)                                                                                                                   |
| GIP(9-42)                 | US              |    | R    | BRIN-BD11: 100% cAMP (1 $\mu$ M), 100% insulin secretion                                                                                                                                                        |     |      | (Kerr et al., 2011)                                                                                                                                                                    |
| GIP(13-42)                | H               |    | H    | Isothermal titration calorimetry: 6-fold lower affinity                                                                                                                                                         |     |      | (Parthier et al., 2007)                                                                                                                                                                |
| GIP(15-42)                | P               | P  | R    | CHO: cAMP, antagonism (10 $\mu$ M): 40 % of GIP(7-30)<br>IC <sub>50</sub> 1270 nM                                                                                                                               | P   | R    | Pancreas perfusion: 40% insulin response (10ng/ml)                                                                                                                                     |
|                           | H               |    | H    | Isothermal titration calorimetry: 10-fold lower affinity                                                                                                                                                        |     |      | (Kerr et al., 2011, Hinke et al., 2001, Pederson and Brown, 1976)                                                                                                                      |
| GIP(17-42)                | B               | P  | Ha   | Pancreas membranes: IC <sub>50</sub> 0.5 $\mu$ M                                                                                                                                                                | B   | R    | Pan.perfusion: 32% insulin response (5 ng/ml)                                                                                                                                          |
|                           | US              | US | R    | RINm5F-cells: No cAMP production (1 $\mu$ M)<br>IC <sub>50</sub> 0.4 $\mu$ M                                                                                                                                    |     |      | (Maletti et al., 1986)                                                                                                                                                                 |
|                           | H               |    | H    | Isothermal titration calorimetry: 15-fold lower affinity                                                                                                                                                        |     |      |                                                                                                                                                                                        |
| GIP(19-42)                | H               |    | H    | Isothermal titration calorimetry: 17-fold lower affinity                                                                                                                                                        |     |      |                                                                                                                                                                                        |
| GIP(21-42)                | H               |    | H    | Isothermal titration calorimetry: 100-fold lower affinity                                                                                                                                                       |     |      | (Parthier et al., 2007)                                                                                                                                                                |
| GIP(23-42)                | H               |    | H    | Isothermal titration calorimetry: <i>No binding</i>                                                                                                                                                             |     |      |                                                                                                                                                                                        |
| GIP(31-44)                | P               |    | R    | L293-cells: No cAMP or pGIP inhibition (10 nM)                                                                                                                                                                  |     |      | (Tseng et al., 1996)                                                                                                                                                                   |

**Supplementary Table 1.** The table displays the in vitro and in vivo references to figure 8, overview of truncated GIP variants. Percentages compared to full agonist GIP(1-42) or GIP(1-30) results. Affinity data is in *italic*. GIP = species sequence of ligand, RL = GIP(1-42) radioligand, GIPR = GIP receptor, B = bovine, P = porcine, R = rat, M = mouse, Ha = hamster, Hu = human, US = unknown species, UC = unknown concentration.

### Reference List

- CHENG, Y. H., HO, M. S., HUANG, W. T., CHOU, Y. T. & KING, K. 2015. Modulation of Glucagon-like Peptide-1 (GLP-1) Potency by Endocannabinoid-like Lipids Represents a Novel Mode of Regulating GLP-1 Receptor Signaling. *J Biol Chem*, 290, 14302-13.
- DEACON, C. F., PLAMBOECK, A., ROSENKILDE, M. M., DE, H. J. & HOLST, J. J. 2006. GIP-(3-42) does not antagonize insulinotropic effects of GIP at physiological concentrations. *Am.J.Physiol Endocrinol.Metab*, 291, E468-E475.
- GALLWITZ, B., WITT, M., FOLSCH, U. R., CREUTZFELDT, W. & SCHMIDT, W. E. 1993. Binding specificity and signal transduction of receptors for glucagon-like peptide-1(7-36)amide and gastric inhibitory polypeptide on RINm5F insulinoma cells. *J Mol Endocrinol*, 10, 259-68.
- GAULT, V. A., HARRIOTT, P., FLATT, P. R. & O'HARTE, F. P. 2002. Cyclic AMP production and insulin releasing activity of synthetic fragment peptides of glucose-dependent insulinotropic polypeptide. *Biosci.Rep.*, 22, 523-528.
- GELLING, R. W., COY, D. H., PEDERSON, R. A., WHEELER, M. B., HINKE, S., KWAN, T. et al. 1997. GIP(6-30amide) contains the high affinity binding region of GIP and is a potent inhibitor of GIP1-42 action in vitro. *Regulatory Peptides*, 69, 151-154.
- HINKE, S. A., MANHART, S., PAMIR, N., DEMUTH, H. U., GELLING, W., PEDERSON, R. A. et al. 2001. Identification of a bioactive domain in the amino-terminus of glucose-dependent insulinotropic polypeptide (GIP). *Biochimica et Biophysica Acta (BBA) - Protein Structure and Molecular Enzymology*, 1547, 143-155.
- IRWIN, N., GREEN, B. D., PARKER, J. C., GAULT, V. A., O'HARTE, F. P. & FLATT, P. R. 2006. Biological activity and antidiabetic potential of synthetic fragment peptides of glucose-dependent insulinotropic polypeptide, GIP(1-16) and (Pro3)GIP(1-16). *Regul Pept*, 135, 45-53.
- KERR, B. D., FLATT, A. J. S., FLATT, P. R. & GAULT, V. A. 2011. Characterization and biological actions of N-terminal truncated forms of glucose-dependent insulinotropic polypeptide. *Biochemical and Biophysical Research Communications*, 404, 870-876.
- MALETTI, M., CARLQUIST, M., PORTHA, B., KERGOAT, M., MUTT, V. & ROSSELIN, G. 1986. Structural requirements for gastric inhibitory polypeptide (GIP) receptor binding and stimulation of insulin release. *Peptides*, 7, Supplement 1, 75-78.
- MORODER, L. H., A.; THAMM, P.; WILSCHOWITZ, L.; BROWN, J. C.; WÜNSCH, E 1978. Studies on gastric inhibitory polypeptide: Synthesis of the octatricosapeptide GIP(1-38) with full insulinotropic activity. *Scandinavian Journal of Gastroenterology* 13.
- MORROW, G. W., KIEFFER, T. J., MCINTOSH, C. H., MACGILLIVRAY, R. T., BROWN, J. C., ST PIERRE, S. et al. 1996. The insulinotropic region of gastric inhibitory polypeptide; fragment analysis suggests the bioactive site lies between residues 19 and 30. *Can J Physiol Pharmacol*, 74, 65-72.
- PARTHIER, C., KLEINSCHMIDT, M., NEUMANN, P., RUDOLPH, R., MANHART, S., SCHLENZIG, D. et al. 2007. Crystal structure of the incretin-bound extracellular domain of a G protein-coupled receptor. *Proc Natl Acad Sci U S A*, 104, 13942-7.
- PEDERSON, R. A. & BROWN, J. C. 1976. The insulinotropic action of gastric inhibitory polypeptide in the perfused isolated rat pancreas. *Endocrinology*, 99, 780-5.
- ROSSOWSKI, W. J., ZACHARIA, S., MUNGAN, Z., OZMEN, V., ERTAN, A., BAYLOR, L. M., JIANG, N. Y. et al. 1992. Reduced gastric acid inhibitory effect of a pGIP(1-30)NH<sub>2</sub> fragment with potent pancreatic amylase inhibitory activity. *Regul Pept*, 39, 9-17.
- SANDBERG, E., AHREN, B., TENDLER, D., CARLQUIST, M. & EFENDIC, S. 1986. Potentiation of glucose-induced insulin secretion in the perfused rat pancreas by porcine GIP (gastric inhibitory polypeptide), bovine GIP, and bovine GIP(1-39). *Acta Physiol Scand*, 127, 323-6.
- TSENG, C. C., KIEFFER, T. J., JARBOE, L. A., USDIN, T. B. & WOLFE, M. M. 1996. Postprandial stimulation of insulin release by glucose-dependent insulinotropic polypeptide (GIP). Effect of a specific glucose-dependent insulinotropic polypeptide receptor antagonist in the rat. *J.Clin.Invest*, 98, 2440-2445.
- TSENG, C. C., ZHANG, X. Y. & WOLFE, M. M. 1999. Effect of GIP and GLP-1 antagonists on insulin release in the rat. *Am.J.Physiol*, 276, E1049-E1054.
- WHEELER, M. B., GELLING, R. W., MCINTOSH, C. H., GEORGIU, J., BROWN, J. C. & PEDERSON, R. A. 1995. Functional expression of the rat pancreatic islet glucose-dependent insulinotropic polypeptide receptor: ligand binding and intracellular signaling properties. *Endocrinology*, 136, 4629-39.
